# Supplementary material for: Positive Childhood Experiences and Adult Mental and Relational Health in a Statewide Sample: Associations Across Adverse Childhood Experiences Levels
Source: PubMed Central journal article supplement (PMC6735495; doi:10.1001/jamapediatrics.2019.3007), 2019-09-09
Supplement: jamapediatr-173-e193007-s001.pdf [file jamapediatr-173-e193007-s001.pdf]

## Supplementary Online Content

Bethell C, Jones J, Gombojav N, Linkenbach J, Sege R. Positive childhood experiences and adult mental and relational health in a statewide sample: associations across adverse childhood experiences levels. *JAMA Pediatr*. Published online September 9, 2019. 10.1001/jamapediatrics.2019.3007

**eTable 1.** Prevalence of Depression/Poor Mental Health (D/PMH) and Demographic Characteristics Among Adults With or Without Missing Values for Positive Childhood Experiences (PCEs), Adult Reported Social and Emotional Support (ARSES) and Adverse Childhood Experiences (ACEs) WI BRFSS State Added Items

**eTable 2.** Summary of Findings From Psychometric Analyses<sup>a</sup> Conducted on Positive Childhood Experiences (PCEs) Seven Item Measure

**eTable 3.** Prevalence of Adult Depression and/or Poor Mental Health (D/PMH) by Adult Reported Social and Emotional Support (ARSES) and Positive Childhood Experiences (PCEs)

**eTable 4.** Adjusted Odds Ratios of Adult Depression and/or Poor Mental Health (D/PMH) by Adult Reported Social and Emotional Support (ARSES) and Positive Childhood Experiences (PCEs) Under Alternative Model Configurations

**eTable 5.** Prevalence of Depression and/or Poor Mental Health (D/PMH) and Adult Reporting "Always" Receiving Needed Social Emotional Support (ARSES), By Positive Childhood Experiences (PCEs) Cumulative Scores and Single Items

**eTable 1:** Prevalence of depression/poor mental health (D/PMH) and demographic characteristics among adults with or without missing values for positive childhood experiences (PCEs), adult reported social and emotional support (ARSES) and adverse childhood experiences (ACEs) WI BRFS state added items.

|                                                       | Positive childhood experiences (PCEs) |                              | Adult reported social and emotional support (ARSES) |                              | Adverse childhood experiences (ACEs) |                              |
|-------------------------------------------------------|---------------------------------------|------------------------------|-----------------------------------------------------|------------------------------|--------------------------------------|------------------------------|
|                                                       | Respondents                           | Non-respondents <sup>a</sup> | Respondents                                         | Non-respondents <sup>a</sup> | Respondents                          | Non-respondents <sup>a</sup> |
| All adults                                            | Raw n=4926                            | Raw n=1256                   | Raw n=5021                                          | Raw n=1117                   | Raw n=4974                           | Raw n=1200                   |
| <b>Depression/poor mental health (D/PMH) (n=6187)</b> |                                       |                              |                                                     |                              |                                      |                              |
| Yes                                                   | 21.6%                                 | 20.2%                        | 21.5%                                               | 20.5%                        | 21.5%                                | 20.6%                        |
| No                                                    | 78.4%                                 | 79.8%                        | 78.5%                                               | 79.5%                        | 78.5%                                | 79.4%                        |
| <b>Age (n=6127)</b>                                   |                                       |                              |                                                     |                              |                                      |                              |
| 18-34 years                                           | 26.4%                                 | 38.3%                        | 26.4%                                               | 37.5%                        | 26.3%                                | 37.5%                        |
| 35-54 years                                           | 32.9%                                 | 33.2%                        | 32.9%                                               | 33.4%                        | 32.9%                                | 33.4%                        |
| 55-64 years                                           | 18.7%                                 | 13.9%                        | 18.6%                                               | 14.2%                        | 18.7%                                | 14.2%                        |
| 65 or older                                           | 22.0%                                 | 14.6%                        | 22.1%                                               | 14.8%                        | 22.2%                                | 14.8%                        |
| <b>Sex (n=6188)</b>                                   |                                       |                              |                                                     |                              |                                      |                              |
| Male                                                  | 49.1%                                 | 49.9%                        | 49.2%                                               | 49.1%                        | 49.1%                                | 49.8%                        |
| Female                                                | 50.9%                                 | 50.1%                        | 50.8%                                               | 50.9%                        | 50.9%                                | 50.2%                        |
| <b>Race/ethnicity (n=6129)</b>                        |                                       |                              |                                                     |                              |                                      |                              |
| Non-White                                             | 12.4%                                 | 23.8%                        | 12.3%                                               | 25.1%                        | 12.3%                                | 24.5%                        |
| White, Non-Hispanic                                   | 87.6%                                 | 76.2%                        | 87.7%                                               | 74.9%                        | 87.7%                                | 75.5%                        |
| <b>Income level (n=5461)<sup>b</sup></b>              |                                       |                              |                                                     |                              |                                      |                              |
| <\$24,999                                             | 20.6%                                 | 29.3%                        | 20.6%                                               | 29.9%                        | 20.6%                                | 29.3%                        |
| \$25,000-\$49,999                                     | 27.9%                                 | 27.4%                        | 27.9%                                               | 27.8%                        | 27.9%                                | 27.4%                        |
| \$50,000-\$74,999                                     | 19.8%                                 | 15.7%                        | 19.6%                                               | 16.0%                        | 19.8%                                | 15.9%                        |
| \$75,000 or more                                      | 31.7%                                 | 27.5%                        | 31.9%                                               | 26.3%                        | 31.7%                                | 27.5%                        |

Source: Author's analysis of the 2015 Wisconsin Behavioral Risk Factor Survey (BRFS).

<sup>a</sup> A 10% missing value rate is expected and attributed to core WI BRFS survey administration to out-of-state cell phones who never received the WI BRFS state added items.<sup>59</sup> The remainder were nearly all due to respondent drop-offs prior to administering the ARSES, ACEs and PCEs questions, which were administered after the end of the core WI BRFS. No notable differences in prevalence of D/PMH were found between respondents and cases missing ARSES, ACEs or PCEs data.<sup>b</sup> See eTable 1. Analysis of missing values did not reveal difference in prevalence of D/PMH between respondents and non-respondents. Younger, non-white adults with lower income more likely to have missing values. (see eTable 1). However, study findings less likely to be affected by the missing cases due to adjustments of demographics characteristics in logistic regression analyses. <sup>b</sup>Income missing values rate is 11.7%. Income was not imputed for the Wisconsin BRFS by the Wisconsin Department of Health Services so Federal Poverty Level could not be calculated.

**eTable 2: Summary of findings from psychometric analyses<sup>a</sup> conducted on positive childhood experiences (PCEs) seven item measure**

| Internal Consistency (Cronbach's alpha) | Principle components factor analysis results                                  | Factor loading across seven items                                   |
|-----------------------------------------|-------------------------------------------------------------------------------|---------------------------------------------------------------------|
| 0.77                                    | A single Eigen value greater than 1.0 (2.95) that explained 42.2% of variance | 0.57 ("felt safe/home") to 0.72 ("family stood by/difficult times") |

Source: Author's analysis of the 2015 Wisconsin Behavioral Risk Factor Survey (BRFS).

<sup>a</sup>Assessment of psychometric properties on the use of the 7 PCEs items as a cumulative score measure included correlational analysis, internal consistency reliability and principal components factor analysis. See table above for summary of findings. Analyses also included assessment of the convergent and divergent validity of using a cumulative score version of the PCEs items versus each item separately. Here, we compared associations with study outcomes using the PCEs cumulative scoring approach against associations using each PCEs item separately. See Figures 1 and 2 in the main paper for findings.

**eTable 3: Prevalence of adult depression and/or poor mental health (D/PMH) by adult reported social and emotional support (ARSES) and positive childhood experiences (PCEs)**

|                                                            | Statewide population prevalence estimates |       | Meets depression and/or poor mental health (D/PMH) criteria |                                            |
|------------------------------------------------------------|-------------------------------------------|-------|-------------------------------------------------------------|--------------------------------------------|
|                                                            | Raw n                                     | %     | %                                                           | Adjusted odds ratio <sup>a</sup> (95% CIs) |
| Reported "always" get needed support                       |                                           |       |                                                             |                                            |
| 0-2 PCEs                                                   | 195                                       | 7.9%  | 33.8%                                                       | 0.27 (0.15-0.49)                           |
| 3-5 PCEs                                                   | 687                                       | 27.3% | 19.7%                                                       | 0.19 (0.11-0.31)                           |
| 6-7 PCEs                                                   | 1743                                      | 64.8% | 8.5%                                                        | 0.10 (0.06-0.16)                           |
| Reported "usually" get needed support                      |                                           |       |                                                             |                                            |
| 0-2 PCEs                                                   | 171                                       | 12.9% | 46.0%                                                       | 0.48 (0.26-0.89)                           |
| 3-5 PCEs                                                   | 507                                       | 41.9% | 28.2%                                                       | 0.32 (0.19-0.55)                           |
| 6-7 PCEs                                                   | 635                                       | 45.2% | 19.8%                                                       | 0.26 (0.16-0.42)                           |
| 2 Reported "sometimes, rarely or never" get needed support |                                           |       |                                                             |                                            |
| 0-2 PCEs                                                   | 263                                       | 28.7% | 61.7%                                                       | Ref (1.00)                                 |
| 3-5 PCEs                                                   | 393                                       | 44.7% | 31.5%                                                       | 0.36 (0.22-0.58)                           |
| 6-7 PCEs                                                   | 284                                       | 26.6% | 25.1%                                                       | 0.28 (0.15-0.50)                           |

Source: Author's analysis of the 2015 Wisconsin Behavioral Risk Factor Survey (BRFS). <sup>a</sup>Adjusted odds ratios (AORs) AORs adjusted for age, sex, race/ethnicity, income and adverse childhood experiences (ACEs).

**eTable 4: Adjusted odds ratios of adult depression and/or poor mental health (D/PMH) by adult reported social and emotional support (ARSES) and positive childhood experiences (PCEs) under alternative model configurations**

|                                                              | Adjusted odds ratios <sup>a</sup> without ARSES adjustment in the model | Adjusted odds ratios <sup>a</sup> without PCEs in the model | Adjusted odds ratios <sup>a</sup> with PCEs and ARSES in the model |
|--------------------------------------------------------------|-------------------------------------------------------------------------|-------------------------------------------------------------|--------------------------------------------------------------------|
| Adult reported social and emotional support (ARSES) (n=5021) |                                                                         |                                                             |                                                                    |
| Always                                                       | N/A                                                                     | 0.32 (0.24-0.42)                                            | 0.38 (0.29-0.51)                                                   |
| Usually                                                      | N/A                                                                     | 0.70 (0.51-0.95)                                            | 0.79 (0.58-1.08)                                                   |
| Sometimes, rarely or never                                   | N/A                                                                     | Ref (1.00)                                                  | Ref (1.00)                                                         |
| Positive childhood experiences (PCEs) (n=4926)               |                                                                         |                                                             |                                                                    |
| 0-2 PCEs reported                                            | Ref (1.00)                                                              | N/A                                                         | Ref (1.00)                                                         |
| 3-5 PCEs reported                                            | 0.50 (0.36-0.69)                                                        | N/A                                                         | 0.53 (0.39-0.74)                                                   |
| 6-7 PCEs reported                                            | 0.28 (0.21-0.39)                                                        | N/A                                                         | 0.36 (0.26-0.50)                                                   |
| Age (n=6127)                                                 |                                                                         |                                                             |                                                                    |
| 18-34 years                                                  | 1.09 (0.78-1.53)                                                        | 1.15 (0.81-1.62)                                            | 1.15 (0.82-1.62)                                                   |
| 35-54 years                                                  | 1.51 (1.10-2.06)                                                        | 1.61 (1.17-2.20)                                            | 1.54 (1.12-2.12)                                                   |
| 55-64 years                                                  | 1.64 (1.20-2.24)                                                        | 1.66 (1.21-2.29)                                            | 1.64 (1.18-2.27)                                                   |
| 65 or older                                                  | Ref (1.00)                                                              | Ref (1.00)                                                  | Ref (1.00)                                                         |
| Sex (n=6188)                                                 |                                                                         |                                                             |                                                                    |
| Male                                                         | 0.59 (0.47-0.74)                                                        | 0.57 (0.45-0.72)                                            | 0.56 (0.44-0.71)                                                   |
| Female                                                       | Ref (1.00)                                                              | Ref (1.00)                                                  | Ref (1.00)                                                         |
| Race/ethnicity (n=6129)                                      |                                                                         |                                                             |                                                                    |
| Non-White                                                    | 0.98 (0.67-1.42)                                                        | 1.04 (0.70-1.55)                                            | 1.03 (0.69-1.52)                                                   |
| White, Non-Hispanic                                          | Ref (1.00)                                                              | Ref (1.00)                                                  | Ref (1.00)                                                         |
| Income Level (n=5461)                                        |                                                                         |                                                             |                                                                    |
| <\$24,999                                                    | 2.91 (2.11-4.02)                                                        | 3.06 (2.21-4.24)                                            | 2.71 (1.95-3.77)                                                   |
| \$25,000-\$49,999                                            | 1.76 (1.29-2.41)                                                        | 1.84 (1.34-2.52)                                            | 1.69 (1.23-2.32)                                                   |
| \$50,000-\$74,999                                            | 1.43 (1.02-2.01)                                                        | 1.38 (0.98-1.95)                                            | 1.35 (0.96-1.91)                                                   |
| \$75,000 or more                                             | Ref (1.00)                                                              | Ref (1.00)                                                  | Ref (1.00)                                                         |
| Adverse childhood experiences (ACEs) (n=4974)                |                                                                         |                                                             |                                                                    |
| 0 ACEs                                                       | Ref (1.00)                                                              | Ref (1.00)                                                  | Ref (1.00)                                                         |
| 1 ACE                                                        | 1.62 (1.18-2.21)                                                        | 1.65 (1.21-2.25)                                            | 1.51 (1.10-2.06)                                                   |
| 2-3 ACEs                                                     | 2.40 (1.77-3.24)                                                        | 2.74 (2.02-3.73)                                            | 2.27 (1.69-3.09)                                                   |
| 4-8 (4+) ACEs                                                | 3.10 (2.20-4.37)                                                        | 4.30 (3.10-5.98)                                            | 2.99 (2.11-4.22)                                                   |

Source: Author's analysis of the 2015 Wisconsin Behavioral Risk Factor Survey (BRFS).

**eTable 5: Prevalence of depression and/or poor mental health (D/PMH) and adult reporting "always" receiving needed social emotional support (ARSES), by positive childhood experiences (PCEs) cumulative scores and single items. Adjusted Odds Ratios shown<sup>a</sup>**

| Positive Childhood Experiences (PCEs) cumulative scores and items | Depression and/or poor mental health (D/PMH) |       |                                            | Adult reporting "always" receiving needed social emotional support (ARSES) |       |                                            |
|-------------------------------------------------------------------|----------------------------------------------|-------|--------------------------------------------|----------------------------------------------------------------------------|-------|--------------------------------------------|
|                                                                   | Raw n                                        | %     | Adjusted odds ratio <sup>a</sup> (95% CIs) | Raw n                                                                      | %     | Adjusted odds ratio <sup>a</sup> (95% CIs) |
| <b>Positive Childhood Experiences (PCEs) cumulative scores</b>    |                                              |       |                                            |                                                                            |       |                                            |
| 0-2 PCEs                                                          | 294                                          | 48.2% | Reference                                  | 195                                                                        | 33.0% | Reference                                  |
| 3-5 PCEs                                                          | 402                                          | 25.1% | 0.50 (0.36-0.69)                           | 687                                                                        | 43.6% | 1.31 (0.97-1.78)                           |
| 6-7 PCEs                                                          | 347                                          | 12.6% | 0.28 (0.21-0.39)                           | 1743                                                                       | 67.9% | 3.53 (2.60-4.80)                           |
| <b>Positive Childhood Experiences (PCEs) items</b>                |                                              |       |                                            |                                                                            |       |                                            |
| 1. Able to talk to family about feelings                          |                                              |       |                                            |                                                                            |       |                                            |
| Never, rarely, or sometimes                                       | 614                                          | 31.7% | Reference                                  | 763                                                                        | 38.6% | Reference                                  |
| Very often or often                                               | 422                                          | 15.2% | 0.59 (0.46-0.74)                           | 1833                                                                       | 65.5% | 2.70 (2.22-3.28)                           |
| 2. Felt family stood by them during difficult times               |                                              |       |                                            |                                                                            |       |                                            |
| Never, rarely, or sometimes                                       | 363                                          | 45.2% | Reference                                  | 282                                                                        | 37.8% | Reference                                  |
| Very often or often                                               | 667                                          | 16.7% | 0.43 (0.32-0.57)                           | 2307                                                                       | 58.3% | 1.90 (1.46-2.48)                           |
| 3. Felt safe and protected by adult in your home                  |                                              |       |                                            |                                                                            |       |                                            |
| Never, a little or some the of time                               | 189                                          | 46.7% | Reference                                  | 132                                                                        | 33.2% | Reference                                  |
| Most or all of the time                                           | 848                                          | 19.0% | 0.55 (0.39-0.78)                           | 2486                                                                       | 57.2% | 1.94 (1.36-2.78)                           |
| 4. Had at least 2 non-parent adults who took genuine interest     |                                              |       |                                            |                                                                            |       |                                            |
| Never, rarely, or sometimes                                       | 418                                          | 31.6% | Reference                                  | 507                                                                        | 38.6% | Reference                                  |
| Very often or often                                               | 614                                          | 17.6% | 0.58 (0.46-0.74)                           | 2080                                                                       | 61.4% | 2.28 (1.85-2.80)                           |
| 5. Felt supported by friends                                      |                                              |       |                                            |                                                                            |       |                                            |
| Never, rarely, or sometimes                                       | 357                                          | 36.8% | Reference                                  | 304                                                                        | 33.6% | Reference                                  |
| Very often or often                                               | 678                                          | 17.9% | 0.56 (0.44-0.72)                           | 2301                                                                       | 59.8% | 2.55 (2.00-3.24)                           |
| 6. Felt a sense of belonging at high school                       |                                              |       |                                            |                                                                            |       |                                            |
| Never, rarely, or sometimes                                       | 443                                          | 36.5% | Reference                                  | 467                                                                        | 41.3% | Reference                                  |
| Very often or often                                               | 581                                          | 16.0% | 0.46 (0.36-0.58)                           | 2106                                                                       | 60.3% | 1.88 (1.53-2.32)                           |
| 7. Enjoyed participating in community traditions                  |                                              |       |                                            |                                                                            |       |                                            |
| Never, rarely, or sometimes                                       | 579                                          | 29.2% | Reference                                  | 887                                                                        | 45.2% | Reference                                  |
| Very often or often                                               | 446                                          | 15.1% | 0.55 (0.44-0.68)                           | 1692                                                                       | 62.8% | 1.84 (1.53-2.21)                           |

Source: Author's analysis of the 2015 Wisconsin Behavioral Risk Factor Survey (BRFS).

<sup>a</sup>Adjusted odds ratios (AORs) shown are adjusted for age, sex, race/ethnicity, income, and adverse childhood experiences (ACEs).
